# Supplementary material
Source: ML conference proceedings conference paper supplement (https://proceedings.mlr.press/v119/zheng20a.html)
Supplement: Supplementary file 1 [file zheng20a-supp.pdf]

## A. The Edgeworth Approximation

We can apply Edgeworth expansion to approximate  $\tilde{F}_n$  directly, following the techniques introduced in Hall (2013). Let us assume  $\mathbf{x} \sim Q$ . Denote

$$X_Q = \frac{T_n - \mathbb{E}_Q[T_n]}{\sqrt{\text{Var}_Q(T_n)}} = \frac{\sum_{i=1}^n (L_i - \mu_i)}{\sqrt{\sum_{i=1}^n \sigma_i^2}}, \quad (\text{A.1})$$

where  $\mu_i$  and  $\sigma_i^2$  are the mean and variance of  $L_i$  under the distribution  $Q_i$ . The characteristic function of  $X_Q$  is

$$\chi_n(t) = \exp\left(\sum_{r=1}^{\infty} \tilde{\kappa}_r(X_Q) \frac{(it)^r}{r!}\right),$$

where  $\tilde{\kappa}_r(X_Q)$  is the  $r$ -th cumulant of  $X_Q$ . Details of how to compute the cumulants are summarized in Appendix B. Let  $\sigma_n = \sqrt{\sum_{i=1}^n \sigma_i^2}$ . Particularly we have

$$\begin{aligned} \tilde{\kappa}_1(X_Q) &= \mathbb{E}_Q(X_Q) = 0, \\ \tilde{\kappa}_2(X_Q) &= \text{Var}_Q(X_Q) = 1, \\ &\vdots \\ \tilde{\kappa}_r(X_Q) &= \tilde{\kappa}_r\left(\sigma_n^{-1} \sum_{i=1}^n (L_i - \mu_i)\right) \\ &= \sigma_n^{-r} \sum_{i=1}^n \tilde{\kappa}_r(L_i), \quad \forall r > 2. \end{aligned} \quad (\text{A.2})$$

We will denote the sum of  $n$  cumulants by  $\tilde{\kappa}_r = \sum_{i=1}^n \tilde{\kappa}_r(L_i)$ . Under the series expansion of the exponential function, we will have

$$\begin{aligned} \chi_n(t) &= \exp\left(-\frac{t^2}{2}\right) \exp\left(\sum_{r=3}^{\infty} \frac{\sigma_n^{-r}}{r!} \tilde{\kappa}_r(it)^r\right) \\ &\approx \exp\left(-\frac{t^2}{2}\right) \exp\left(\sum_{r=3,4} \frac{\sigma_n^{-r}}{r!} \tilde{\kappa}_r(it)^r\right) \\ &\approx \exp\left(-\frac{t^2}{2}\right) \left(1 + \sigma_n^{-3} \cdot \overbrace{\frac{1}{6} \tilde{\kappa}_3(it)^3}^{r_1(it)}\right. \\ &\quad \left. + \sigma_n^{-4} \cdot \overbrace{\frac{1}{24} \tilde{\kappa}_4(it)^4}^{r_2(it)} + \sigma_n^{-6} \cdot \overbrace{\frac{1}{72} \tilde{\kappa}_3(it)^6}^{r_3(it)}\right). \end{aligned} \quad (\text{A.3})$$

Since  $\chi_n(t) = \int e^{ith} d\tilde{F}_n(h)$  and  $e^{-t^2/2} = \int e^{ith} d\Phi(h)$ , we can obtain the corresponding ‘‘inverse’’ expansion:

$$\tilde{F}_n(h) \approx \Phi(h) + \sigma_n^{-3} \cdot R_1(h) + \sigma_n^{-4} \cdot R_2(h) + \sigma_n^{-6} \cdot R_3(h), \quad (\text{A.4})$$

and  $R_j(h)$  is a function whose Fourier-Stieljes transform equals  $r_j(it)e^{-t^2/2}$ :

$$\int_{-\infty}^{\infty} e^{ith} dR_j(h) = r_j(it)e^{-t^2/2}.$$

Let  $D$  denote the differential operator  $d/dh$ . We have

$$e^{-t^2/2} = (-it)^{-j} \int_{-\infty}^{\infty} e^{ith} d\{D^j \Phi(h)\}$$

and hence

$$\int_{-\infty}^{\infty} e^{ith} d\{(-D)^j \Phi(h)\} = (it)^j e^{-t^2/2}.$$

Let us interpret  $r_j(-D)$  as a polynomial in  $D$ , we then obtain

$$\int_{-\infty}^{\infty} e^{ith} d\{r_j(-D)\Phi(h)\} = r_j(it)e^{-t^2/2}.$$

Consequently,

$$R_j(h) = r_j(-D)\phi(h). \quad (\text{A.5})$$

It is well known that for  $j \geq 1$ ,

$$(-D)^j \Phi(h) = -He_{j-1}(h)\phi(h) \quad (\text{A.6})$$

and  $He_j$ s are the Hermite polynomials:

$$\begin{aligned} He_0(h) &= 1, \\ He_1(h) &= h, \\ He_2(h) &= h^2 - 1, \\ He_3(h) &= h^3 - 3h, \\ He_4(h) &= h^4 - 6h^2 + 3, \\ He_5(h) &= h^5 - 10h^3 + 15h, \\ He_6(h) &= h^6 - 15h^4 + 45h^2 - 15, \\ He_7(h) &= h^7 - 21h^5 + 105h^3, \\ &\dots \end{aligned} \quad (\text{A.7})$$

Combine equations A.4, A.5, A.6 and A.7 we can deduce the final result:

$$\begin{aligned} \tilde{F}_n(h) &\approx \Phi(h) + \sigma_n^{-3} \cdot -\frac{1}{6}\tilde{\kappa}_3(h^2 - 1)\phi(h) \\ &\quad + \sigma_n^{-4} \cdot -\frac{1}{24}\tilde{\kappa}_4(h^3 - 3h)\phi(h) \\ &\quad + \sigma_n^{-6} \cdot -\frac{1}{72}\tilde{\kappa}_3^2(h^5 - 10h^3 + 15h)\phi(h). \end{aligned} \quad (\text{A.8})$$

In A.3, the truncation happens in both the second and third line. In the second line, we truncated terms where  $r \geq 5$ . In the following line, we apply the series expansion to the exponential function, and we stopped after taking  $t_1 := \sigma_n^{-3} \cdot \frac{1}{6}\tilde{\kappa}_3(it)^3$ ,  $t_2 := \sigma_n^{-4} \cdot \frac{1}{24}\tilde{\kappa}_4(it)^4$  and the square of  $t_1$ .

The error stems from truncating  $r \geq 5$  terms in the second line will be dominated by  $\frac{1}{120}\sigma_n^{-5}\tilde{\kappa}_5(it)^5$  in the series expansion. The error stems from truncating the expansion of  $r = 3, 4$  terms in the following line will be dominated by the square of  $t_2$ :  $\sigma_n^{-8} \cdot \frac{1}{576}\tilde{\kappa}_4^2(it)^8$ .

Since all  $L_i$ 's are identically distributed, the cumulants of  $L_1, \dots, L_n$  take the same value for any fixed order. Therefore,  $\sigma_1 = \dots = \sigma_n = \sigma$  and  $\tilde{\kappa}_r = \tilde{\kappa}_r(L_1) = \dots = \tilde{\kappa}_r(L_n)$ . As a consequence, we have  $\sigma_n = \sqrt{n}\sigma$  and  $\tilde{\kappa}_r = n\tilde{\kappa}_r$ . This leads to

$$\begin{aligned} \sigma_n^{-3} \cdot \tilde{\kappa}_3(it)^3 &\sim n^{-1/2}(it)^3, \\ \sigma_n^{-4} \cdot \tilde{\kappa}_4(it)^4 &\sim n^{-1}(it)^4, \\ \sigma_n^{-6} \cdot \tilde{\kappa}_3^2(it)^6 &\sim n^{-1}(it)^6, \\ \sigma_n^{-8} \cdot \tilde{\kappa}_4^2(it)^8 &\sim n^{-2}(it)^8, \\ \sigma_n^{-5} \cdot \tilde{\kappa}_5(it)^5 &\sim n^{-3/2}(it)^5. \end{aligned} \quad (\text{A.9})$$

Hence the error for approximating  $\chi_n(t)$  is upper bounded by  $O(n^{-2}(it)^8 + n^{-3/2}(it)^5)$ . Next, we connect the characteristic function to CDF  $\tilde{F}_n(h)$ . From equations A.5 and A.6, we know the error term will be transformed into  $O(n^{-2}He_7(h) + n^{-3/2}He_4(h))$  as approximating  $\tilde{F}_n(h)$ , which is  $O(n^{-2}h^7 + n^{-3/2}h^3)$ .

## B. Computing Cumulants From Moments

The cumulants of a random variable  $X$  are defined using the cumulant-generating function  $K(t)$ . It is the natural logarithm of the moment-generating function:

$$K(t) = \log \mathbb{E} (e^{tX}) ,$$

and the cumulants are the coefficients in the Taylor expansion of  $K(t)$  about the origin:

$$K(t) = \log \mathbb{E} (e^{tX}) = \sum_{r=0}^{\infty} \kappa_r t^r / r!.$$

For any integer  $r \geq 0$ , the  $r$ -th order non-central moment of  $X$  is  $\mu_r = \mathbb{E}(X^r)$ . Recall the Taylor expansion of the moment-generating function  $M(t)$  about the origin

$$M(t) = \mathbb{E} (e^{tX}) = \sum_{r=0}^{\infty} \mu_r t^r / r! = \exp (K(t)) .$$

The cumulants can be recovered in terms of the moments and vice versa. In general,

$$\kappa_r = \sum_{k=1}^r (-1)^{k-1} (k-1)! B_{r,k}(\mu_1, \dots, \mu_{r-k+1})$$

where  $B_{n,k}$  are Bell polynomials. The relationship between the first few cumulants and moments is as the following:

$$\begin{aligned} \kappa_0 &= 0, \\ \kappa_1 &= \mu_1, \\ \kappa_2 &= \mu_2 - \mu_1^2, \\ \kappa_3 &= \mu_3 - 3\mu_2\mu_1 + 2\mu_1^3, \\ \kappa_4 &= \mu_4 - 4\mu_3\mu_1 - 3\mu_2^2 + 12\mu_2\mu_1^2 - 6\mu_1^4. \end{aligned}$$

## C. $\mathcal{N}(0, 1)$ vs $p\mathcal{N}(\mu, 1) + (1-p)\mathcal{N}(0, 1)$

Let  $P$  be the standard normal distribution  $\mathcal{N}(0, 1)$  and  $Q$  be a mixture model  $p\mathcal{N}(\mu, 1) + (1-p)\mathcal{N}(0, 1)$  with  $\mu \geq 0$ . We now show that

**Lemma C.1.**

$$T(P, Q) = pG_\mu + (1-p)\text{Id}.$$

*Proof.* The likelihood ratio between  $Q$  and  $P$  is

$$pe^{-\frac{1}{2}(x-\mu)^2 + \frac{1}{2}x^2} + 1 - p = pe^{\mu x - \frac{1}{2}\mu^2} + 1 - p.$$

Since  $\mu \geq 0$ , likelihood ratio tests are thresholding, i.e.,  $\{x : x > h\}$ . The type I and type II errors are

$$\begin{aligned} \alpha &= P\{x : x > h\} = 1 - \Phi(h), \\ \beta &= Q\{x : x \leq h\} \\ &= p \mathbb{E}_{x \sim \mathcal{N}(\mu, 1)}[1_{\{x \leq h\}}] + (1-p) \mathbb{E}_{x \sim \mathcal{N}(0, 1)}[1_{\{x \leq h\}}] \\ &= p\Phi(h - \mu) + (1-p)\Phi(h). \end{aligned}$$

Inverting the first formula, we have  $h = \Phi^{-1}(1 - \alpha)$ . So

$$\beta = p\Phi(h - \mu) + (1-p)\Phi(h) = p\Phi(\Phi^{-1}(1 - \alpha) - \mu) + (1-p)(1 - \alpha)$$

Making use of the known expression  $G_\mu(\alpha) = \Phi(\Phi^{-1}(1 - \alpha) - \mu)$  and  $\text{Id}(\alpha) = 1 - \alpha$ , we have

$$T(P, Q)(\alpha) = \beta = pG_\mu(\alpha) + (1-p)\text{Id}(\alpha).$$

□

## D. Details of the Numerical Method

### D.1. Proof of Lemma 5.1

*Proof.* By definition of convex conjugacy,  $\delta \geq \delta_1(\varepsilon)$  if and only if  $f(x) \geq 1 - \delta - e^\varepsilon x$  for all  $x \in [0, 1]$ . Since  $f = T(P, Q)$  characterizes optimal testing rules,  $f(x) \geq 1 - \delta - e^\varepsilon x$  for any  $x \in [0, 1]$  if and only if for any event  $E$ ,  $Q[E] \leq e^\varepsilon P[E] + \delta$ . That is,

$$\begin{aligned} \delta_1(\varepsilon) &= \min\{\delta : Q[E] \leq e^\varepsilon P[E] + \delta, \forall E\} \\ &= \max_E Q[E] - e^\varepsilon P[E] \\ &= \max_E \int_E [q(x) - e^\varepsilon p(x)] d\mu(x). \end{aligned}$$

Obviously, the maximum is attained at the event that the integrand being non-negative. That is,  $E = \{x : q(x) - e^\varepsilon p(x) \geq 0\}$ . Therefore,

$$\delta_1(\varepsilon) = \int (q - e^\varepsilon p)_+ d\mu.$$

□

### D.2. Proof of Lemma 5.2

*Proof.* By definition of  $\otimes$  and Lemma 5.1, we have

$$\begin{aligned} \delta_{\otimes}(\varepsilon) &= 1 + (f_1 \otimes f_2)^*(-e^\varepsilon) \\ &= 1 + (T(P_1 \times P_2, Q_1 \times Q_2))^*(-e^\varepsilon) && \text{(Def of } \otimes) \\ &= \iint (q_1(x)q_2(y) - e^\varepsilon p_1(x)p_2(y))_+ dx dy && \text{(Lemma 5.1)} \\ &= \iint q_2(y) \cdot \left(q_1(x) - e^\varepsilon p_1(x) \cdot \frac{p_2(y)}{q_2(y)}\right)_+ dx dy && (q_2(y) \geq 0) \\ &= \iint q_2(y) \cdot \left(q_1(x) - e^{\varepsilon - L_2(y)} p_1(x)\right)_+ dx dy && \text{(Def of } L_2) \\ &= \int q_2(y) \cdot \left[\int (q_1(x) - e^{\varepsilon - L_2(y)} p_1(x))_+ dx\right] dy && \text{(Fubini)} \\ &= \int q_2(y) \cdot \delta_1(\varepsilon - L_2(y)) dy. && \text{(Lemma 5.1 on } \delta_1) \end{aligned}$$

□

## E. Privacy Guarantees for Noisy SGD with Sampling Rate $p = \frac{0.5}{\sqrt{n}}$

In Section 5.3 we present the result when the sampling rate  $p = 0.5/n^{\frac{1}{4}}$ . Since the convergence of CLT requires the assumption  $p\sqrt{n} \rightarrow \nu > 0$  (Bu et al., 2019), that is a regime where the performance of CLT does not have theoretical guarantees. Here we present the results when  $p = 0.5/n^{\frac{1}{2}}$ , where the convergence of CLT is guaranteed. However, we still observe that Edgeworth outperforms CLT. See Figure E.1 and E.2 for the comparison.

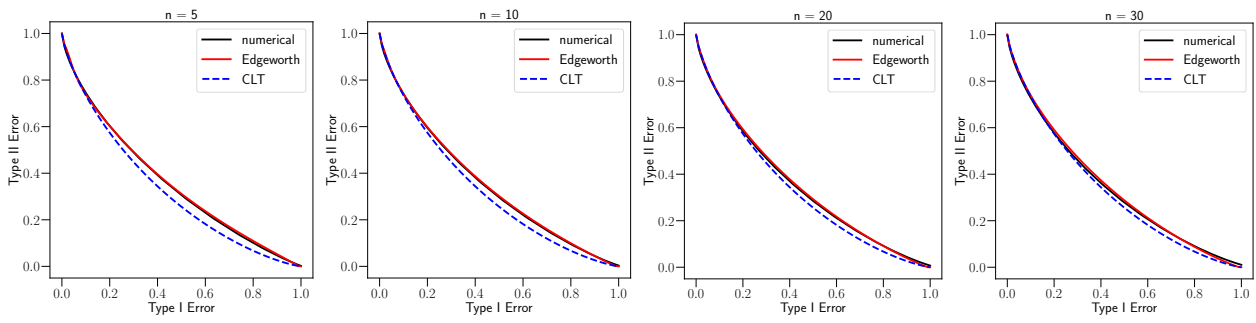

Figure E.1. The estimation of  $0.5/n^{\frac{1}{2}}(G_1 + \text{Id})^{\otimes n}$ .

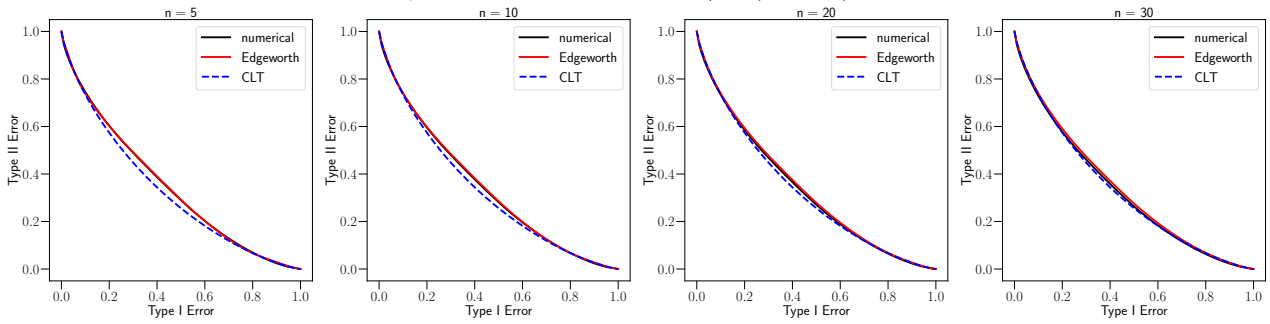

Figure E.2. The estimation of the privacy bound for  $n$ -step noisy SGD. The sampling rate is  $p = 0.5/n^{\frac{1}{2}}$  and the noise scale is  $\sigma = 1$ .
